RESEARCH ARTICLE

# Efficacy and Safety of Initial Combination Treatment of an Alpha Blocker with an Anticholinergic Medication in Benign Prostatic Hyperplasia Patients with Lower Urinary Tract Symptoms: Updated Meta-Analysis

Hyun Jung Kim<sup>1</sup>, Hwa Yeon Sun<sup>2</sup>, Hoon Choi<sup>3</sup>, Jae Young Park<sup>3</sup>, Jae Hyun Bae<sup>3</sup>, Seung Whan Doo<sup>2</sup>, Won Jae Yang<sup>2</sup>, Yun Seob Song<sup>2</sup>, Young Myoung Ko<sup>4</sup>, Jae Heon Kim<sup>2\*</sup>

**1** Department of Preventive Medicine, College of Medicine, Korea University, Seoul, Korea, **2** Department of Urology, Soonchunhyang University Hospital, Soonchunhyang University College of Medicine, Seoul, Korea, **3** Department of Urology, Korea University Hospital, Korea University College of Medicine, Ansan, Korea, **4** Department of Industrial and Management Engineering, Pohang University of Science and Technology, Pohang, Korea

\* [piacekjh@hanmail.net](mailto:piacekjh@hanmail.net)

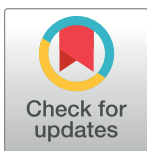

**OPEN ACCESS**

**Citation:** Kim HJ, Sun HY, Choi H, Park JY, Bae JH, Doo SW, et al. (2017) Efficacy and Safety of Initial Combination Treatment of an Alpha Blocker with an Anticholinergic Medication in Benign Prostatic Hyperplasia Patients with Lower Urinary Tract Symptoms: Updated Meta-Analysis. PLoS ONE 12 (1): e0169248. doi:10.1371/journal.pone.0169248

**Editor:** Hemant Kumar Bid, University of Michigan, UNITED STATES

**Received:** November 15, 2016

**Accepted:** December 14, 2016

**Published:** January 10, 2017

**Copyright:** © 2017 Kim et al. This is an open access article distributed under the terms of the [Creative Commons Attribution License](https://creativecommons.org/licenses/by/4.0/), which permits unrestricted use, distribution, and reproduction in any medium, provided the original author and source are credited.

**Data Availability Statement:** All relevant data are within the paper and its Supporting Information files.

**Funding:** This study was supported by Astellas Pharma Korea, Inc. and Soonchunhyang University Research Fund, Republic of Korea. The funders had no role in study design, data collection and analysis, decision to publish, or preparation of the manuscript.

## Abstract

### Background

There is still controversy as to whether initial combination treatment is superior to serial addition of anticholinergics after maintenance or induction of alpha blockers in benign prostatic hyperplasia (BPH)/lower urinary tract symptoms (LUTS)

### Objective

The objective of this study was to determine the benefits and safety of initial combination treatment of an alpha blocker with anticholinergic medication in BPH/LUTS through a systematic review and meta-analysis.

### Methods

We conducted a meta-analysis of improvement in LUTS using International Prostate Symptom Score (IPSS), maximal urinary flow rate (Qmax), post-voided residual volume (PVR), and quality of life (QoL).

### Results

In total, 16 studies were included in our analysis, with a total sample size of 3,548 subjects (2,195 experimental subjects and 1,353 controls). The mean change in total IPSS improvement from baseline in the combination group versus the alpha blocker monotherapy group was -0.03 (95% CI: -0.14–0.08). The pooled overall SMD change of storage IPSS improvement from baseline was -0.28 (95% CI: -0.40 - -0.17). The pooled overall SMD changes of QoL, Qmax, and PVR were -0.29 (95% CI: -0.50 - -0.07), 0.00 (95% CI: -0.08–0.08), and

**Competing Interests:** This study was partly supported by Astellas Pharma Korea, Inc. There are no patents, products in development or marketed products to declare. This does not alter our adherence to all the PLOS ONE policies on sharing data and materials, as detailed online in the guide for authors.

0.56 (95% CI: 0.23–0.89), respectively. There was no significant difference in the number of acute urinary retention (AUR) events or PVR.

## Conclusions

Initial combination treatment of an alpha blocker with anticholinergic medication is efficacious for in BPH/ LUTS with improved measures such as storage symptoms and QoL without causing significant deterioration of voiding function.

## Introduction

Benign prostatic hyperplasia (BPH) with lower urinary tract symptoms (LUTS) is a common disease entity. It increases in prevalence according to age. Several medical treatments are available for BPH/LUTS. Alpha blockers are its first-line treatment because they are shown to be effective and safe in relaxing prostatic urethra and bladder neck [1,2]. However, more than half of BPH/LUTS patients have symptoms of overactive bladder (OAB) [3,4]. Although alpha blockers have shown some efficacy, the effect of alpha blockers in the treatment of OAB still remains uncertain [5,6]. Hence, BPH/LUTS patients with OAB or increased bladder sensation could have persistent OAB symptoms despite using alpha blockers [7].

For the last few decades, treatment for OAB has been focused on prostate enlargement itself. This has contributed to the onset of voiding symptoms and secondary OAB. Therefore, treatment guidelines have been modified in order to focus more on the bothersome symptoms themselves [2]. Moreover, OAB symptoms including urgency, frequency, nocturia, and urge incontinence have been reported to be more bothersome than voiding symptoms. They result in greater deterioration in quality of life [8,9].

To overcome the limitations in improving OAB symptoms with initial alpha blocker treatment with more focus on the treatment of more bothersome symptoms, many clinicians have considered the initial use of or earlier introduction of anti-muscarinic agents to control the bothersome OAB symptoms [1,2]. However, initial or earlier treatment with anti-muscarinic agents is controversial due to concerns over their safety. The major concern regarding the safety of anti-muscarinic agents is their inhibitory effect on bladder detrusor contractility which could result in a large amount of post-voided residual volume (PVR) and acute urinary retention (AUR) [3,10–15]. To investigate the efficacy and safety of a combination treatment of alpha blockers and anticholinergics, two systematic reviews (SRs) with meta-analyses have been conducted to investigate the efficacy and safety of such combination treatment [5,6]. However, those two studies have two major limitations. First, their inclusion criteria for SRs were expanded so that patients treated with “add on” anticholinergics after the initial or induction treatment with alpha blocker were included [6]. Second, many studies on initial combination treatment were not included [5].

Whether initial combination treatment is superior to serial addition of anticholinergics after maintenance or induction of alpha blockers remains controversial. One recent study has addressed this controversy with potent evidence. Matsukawa et al. [16] have reported that alpha blocker monotherapy has limited effect on OAB, resulting in worse clinical outcomes after 3 months even though the alpha blocker monotherapy is effective in the first 3 months. They have also demonstrated the superiority of initial combinatorial therapy compared to alpha blocker monotherapy for BPH patients with OAB [16].

The aim of the current study was to determine the efficacy and safety of initial combination of alpha blockers with anticholinergics for BPH patients with OAB using broad scientific search methods to overcome the limitations encountered by previous SRs.

## Materials and Methods

### Inclusion criteria

A meta-analysis and systematic review were conducted according to predefined guidelines provided by the Cochrane Collaboration. Both randomized controlled clinical trials (RCTs) and non-RCTs were included in this analysis. Participants were patients who were diagnosed with symptomatic BPH. Diagnostic tools included international prostate symptom score (IPSS), storage symptoms of IPSS (storage IPSS), quality of life (QoL) score, maximum flow rate (Qmax), post-void residual urine (PVR), and acute urinary retention (AUR).

### Search strategies and inclusion of studies

Studies published before April 2016 April in MEDLINE were searched using MeSH headings of prostatic hyperplasia for disease entity. For drugs used for prostatic hyperplasia, alpha blockers (including tamsulosin, terazosin, doxazosin, alfuzocin, naftopidil, and silodosin) and anticholinergics (including solifenacin, tolterodine, fesoterodine, propiverine, oxybutinin, trospium sodium, and darifenacin) were searched within subheadings of studies. The detailed search algorithm is shown below: "1. Prostatic Hyperplasia"[Mesh] 2. (Prostatic [tiab] OR Prostate [tiab]) AND (Hyperplasia [tiab] OR Hypertrophy [tiab] OR Adenomas [tiab] OR Adenoma [tiab]) OR "BPH" [tiab] 3. 1 OR 2 4. Solifenacin [Supplementary Concept] OR tolterodine [Supplementary Concept] OR fesoterodine [Supplementary Concept] OR oxybutynin [Supplementary Concept] OR propiverine [Supplementary Concept] 5. Solifenacin [tiab] OR tolterodine [tiab] OR fesoterodine [tiab] OR oxybutynin [tiab] OR propiverine [tiab] 6. 4 OR 5 7. tamsulosin [Supplementary Concept] OR silodosin [Supplementary Concept] OR Doxazosin[Mesh] OR Terazosin [Supplementary Concept] OR alfuzosin [Supplementary Concept] 8. Tamsulosin [tiab] OR silodosin [tiab] OR Doxazosin [tiab] OR Terazosin [tiab] OR alfuzosin [tiab] 9. 7 OR 8 10. 6 OR 9 11. 10 AND 3 12. 11 AND ("randomized controlled trial"[Publication Type] OR "controlled clinical trial"[Publication Type] OR randomized [tiab] OR placebo [tiab] OR "clinical trials as topic" [Mesh:noexp] OR randomly [tiab] OR trial [ti])) NOT ((animals [Mesh] NOT (humans [Mesh] AND animals [Mesh]))) 13. NOT "review" [Publication Type] OR "review literature as topic" [MeSH Terms]."

Articles in EMBASE and the Cochrane Library were also searched. Searching strategies included manual searching for additional studies published in English or other languages. Studies were included if they met the following criteria: (i) Those with outcome measurements, including at least one outcome among IPSS, QoL, Qmax, and PVR, (ii) interventions with initial combination treatment of alpha blockers and anticholinergic agents, (iii) disease entity of prostatic hyperplasia, and (iv) RCTs.

### Data collection and endpoints

Two investigators independently assessed the initial screening results obtained from electronic databases. For non-English studies, native translator assisted the two independent investigators. Final inclusion of studies was based on discussion between the two investigators. After determining the eligibility, data extraction was performed for baseline characteristics, including source of country, race, number of patients, year, ages, inclusion criteria, and symptom duration. The primary endpoints were outcomes, including efficacy, data of total IPSS, voiding

IPSS, storage IPSS, Qmax, and QoL. The secondary outcome was safety, including PVR, incidence of AUR, and other adverse events (AEs).

## Methodological quality

Cochrane Collaboration tool was used to judge the methodological quality of included studies.

## Meta-analysis of outcome findings and statistical analysis

To analyze continuous variables including total IPSS, storage IPSS, voiding IPSS, QoL, Qmax, and PVR, standardized mean difference (SMD) and 95% confidence intervals (CIs) were calculated. STATA version 14 software (Stata Corp LP, College Station, TX, USA) was used for all data analysis. Meta-analyses were performed using the random-effect model of DerSimonian and Laird to obtain pooled overall SMD with 95% CIs for outcomes.

Sensitivity analysis was performed to adjust for the effect of study quality because we included double-blinded RCTs and single-blinded RCTs as well as unclear RCTs. Using sensitivity analysis, the quality of studies were classified into subgroups by specific comparison of means. Statistical heterogeneity was assessed using the  $I^2$  value and the Chi-squared test. A  $p$ -value < 0.1 and an  $I^2$  value >50% were considered suggestive of significant statistical heterogeneity, prompting a random effects modeling estimate

Meta-regression analysis was conducted for each moderating factor. To examine potential moderators (e.g., number of patients, study duration, country, and medication types), restricted maximum likelihood (REML) was estimated for the variance of true effects.

Mann-Whitney U test was used for comparison between means (e.g., storage IPSS and PVR).  $X^2$  test and Fisher's exact test were used to compare proportions (e.g., AE) and frequency variables between the combination group and the monotherapy group. A two-sided  $p$ -value of 0.05 or less was considered as statistically significant.

## Results

### Inclusion of studies

The initial search identified a total of 1,851 articles from the electronic databases (Pubmed:  $n = 466$ ; Cochrane:  $n = 792$ ; Embase:  $n = 514$ , and Koreamed:  $n = 89$ ). After excluding 651 duplicated studies and 484 studies due to non-related topics, detailed evaluation was performed. For the remaining 716 studies, a total of 671 studies were excluded due to ineligible abstract or data. Among the remaining 51 eligible studies, thorough full-text evaluation were performed. A total of 35 studies were excluded due to different study design including additional treatment with anticholinergics ( $n = 13$ ), less than daily treatment with anticholinergics ( $n = 2$ ), incomplete data with wrong indications ( $n = 17$ ), or duplicated data including post-hoc analysis of previous RCTs ( $n = 3$ ). Finally, 16 studies were selected for this present study with a total of 23,716 subjects (2,304 experimental subjects and 1,412 controls). The detailed process of filtering and inclusion is shown in [Fig 1](#). Detailed characteristics of included studies are described in [Table 1](#).

### Methodological quality

Quality assessment and characteristics of the 16 included studies are summarized in [Table 2](#). All studies utilized randomized methods and reasonable ITT analysis except one [17]. Eleven studies [13,16,18–26] were conducted using allocation concealment with detailed description of the concealment method. One study was a single-blinded study [18] while six studies were

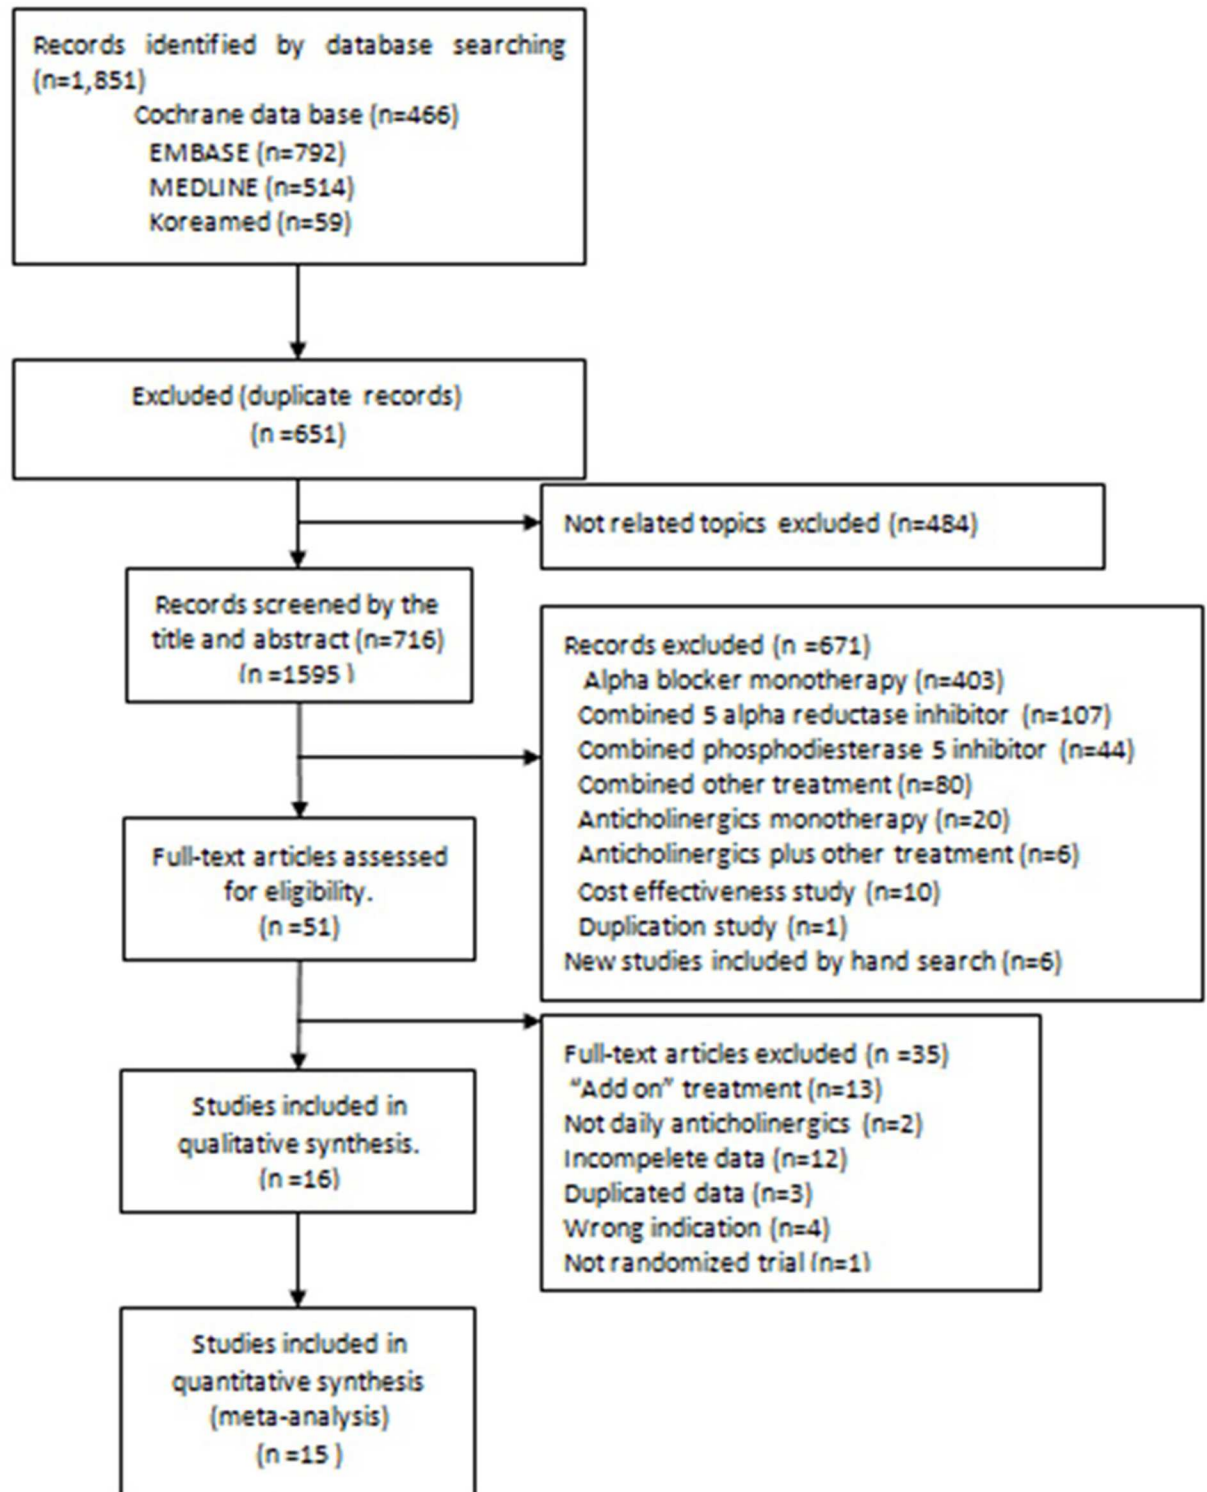

**Fig 1. Search methods and inclusion criteria.**

doi:10.1371/journal.pone.0169248.g001

**Table 1. General characteristics of included studies.**

| Study                   | country               | Alpha blockers     | Anticholinergics                        | Study Duration | Age   | Subject Description                                                                                                                                              | Placebo controlled | Storage symptom dominant patient |
|-------------------------|-----------------------|--------------------|-----------------------------------------|----------------|-------|------------------------------------------------------------------------------------------------------------------------------------------------------------------|--------------------|----------------------------------|
| Lee, 2005               | Korea                 | Doxazosin 4mg      | Propiverine 20mg                        | 8 weeks        | ≥50   | OAB ≥ 6mo, BOO, AG (Abrams-Griffith) score ≥20, urgency ≥1, frequency ≥8                                                                                         | No                 | Yes                              |
| Kaplan, 2006            | NA                    | Tamsulosin 0.4mg   | Tolterodine 4mg                         | 12 weeks       | ≥40   | IPSS ≥12, QoL ≥3, frequency ≥8, urgency ≥3                                                                                                                       | Yes                | Yes                              |
| Maruyama, 2006          | Japan                 | Naftofidil 25–75mg | Propiverine 10–20mg or Oxybutynin 2–6mg | 12 weeks       | NA    | BPH, IPSS ≥8, QoL ≥2                                                                                                                                             | No                 | No                               |
| Yokoyama, 2009          | Japan                 | Naftofidil 50mg    | Propiverine 20mg                        | 4 weeks        | ≥50   | LUTS/OAB, IPSS ≥8, urinary urgency ≥1, frequency ≥8, night-time voiding frequency ≥1, PVR ≥50ml                                                                  | No                 | Yes                              |
| Wu, 2009                | China                 | Tamsulosin 0.2mg   | Tolterodine 2mg                         | 12 weeks       | ≥50   | BPH, IPSS ≥8, QoL ≥3, storage subscore ≥6, PVR <60ml, Qmax ≤15 ml/s, voided volume ≥200 ml                                                                       | No                 | Yes                              |
| Bae, 2011               | Korea                 | Alfuzocin 10mg     | Propiverine 10mg                        | 8 weeks        | ≥50   | LUTS/BPH, IPSS ≥12, IPSS storage subscore ≥4, PVR >200ml                                                                                                         | No                 | Yes                              |
| Gan, 2011               | China                 | Doxazocin 4mg      | Tolterodine 4mg                         | 12 weeks       | NA    | BPH, IPSS ≥ 13                                                                                                                                                   | No                 | No                               |
| Shen, 2011              | China                 | Terazosin 2mg      | Tolterodine 2mg                         | 12 weeks       | ≥60   | BPH, IPSS ≥8, Qmax <15ml/s                                                                                                                                       | No                 | No                               |
| Seo, 2011               | Korea                 | Tamsulosin 0.2mg   | Solifenacin 5mg                         | 12 weeks       | ≥40   | LUTS/BPH/ED, IPSS total score >12, QoL >3, IIEF-5 score <20                                                                                                      | No                 | No                               |
| Lee, 2011               | Korea                 | Doxazosin 4mg      | Tolterodine 4mg                         | 12 weeks       | ≥50   | LUTS/BPH/OAB, IPSS ≥14, voiding subscore ≥8, storage subscore ≥6, QoL ≥3, micturition frequency ≥8, urgency ≥1, ≥20 cc, Qmax ≤15 ml s, VV ≥125 ml.               | No                 | Yes                              |
| Van Kerrebroeck, 2013_S | 17 European countries | Tamsulosin 0.4mg   | Solifenacin 3mg or 6mg or 9mg           | 12 weeks       | ≥45   | LUTS, voiding and storage symptoms, IPSS ≥ 13, Qmax 4–15 ml/s, VV ≥120 ml                                                                                        | Yes                | No                               |
| Van Kerrebroeck, 2013_N | 13 countries          | Tamsulosin 0.4mg   | Solifenacin 6mg or 9mg                  | 12 weeks       | ≥45   | LUTS ≥3mo, IPSS ≥ 13, Qmax 4–12 ml/s, VV ≥120 m, micturitions ≥8                                                                                                 | Yes                | No                               |
| Wang, 2013              | China                 | Doxazosin 4mg      | Tolterodine 4mg                         | 8weeks         | 50–80 | BPH/OAB, IPSS >8, OABSS >3, QoL >3, PVR <100ml, Qmax >5ml/s PSA <4ug/l                                                                                           | No                 | Yes                              |
| Lee, 2014               | Korea                 | Tamsulosin 0.2mg   | Solifenacin 5mg                         | 12 weeks       | ≥40   | LUTS/BPH/OAB, IPSS ≥14, voiding subscore ≥8, storage subscore ≥6, QoL ≥3, micturition frequency ≥8, urgency ≥1, PV ≥20 cc, Qmax ≤15 ml/s, voided volume ≥125 ml. | No                 | Yes                              |
| Lee, 2016               | Korea                 | Tamsulosin 0.2mg   | Solifenacin 5mg                         | 12 weeks       | ≥45   | LUTS, IPSS ≥8, OABSS ≥3, PV ≥20mL                                                                                                                                | No                 | Yes                              |
| Matsukawa, 2016         | Japan                 | Silodosin 8mg      | Propiverine 20mg                        | 12 weeks       | ≥50   | LUTS, IPSS ≥8, QoL ≥3, OABSS ≥3, urgency ≥1, prostate volume ≥25ml, Qmax <15ml/s, VV ≥100ml, PVR <150ml                                                          | No                 | Yes                              |

OAB, overactive bladder; BOO, bladder outlet obstruction; IPSS, International Prostate Symptom Score; QoL, quality of life; BPH, benign prostatic hyperplasia; LUTS, lower urinary tract symptom; VV, voided volume; PV, prostate volume; PVR, post-voided residual volume; Qmax, maximal urinary flow rate; OABSS, overactive bladder symptom score.

doi:10.1371/journal.pone.0169248.t001



**Table 2. Methodological qualities of included studies.**

| Study          | Random sequence selection bias                                            | Allocation concealment (selection bias)                                                                                                                                                                                                                                              | Blinding of participants and personnel (performance bias) | Blinding of outcome assessment (detection bias) | Incomplete outcome data (attrition bias)                                                                                                                 | Selective reporting (reporting bias)                                                                                                                                                                                                                                           | Other bias                                                   |
|----------------|---------------------------------------------------------------------------|--------------------------------------------------------------------------------------------------------------------------------------------------------------------------------------------------------------------------------------------------------------------------------------|-----------------------------------------------------------|-------------------------------------------------|----------------------------------------------------------------------------------------------------------------------------------------------------------|--------------------------------------------------------------------------------------------------------------------------------------------------------------------------------------------------------------------------------------------------------------------------------|--------------------------------------------------------------|
| Lee, 2005      | Low risk (Described "randomized")                                         | Low risk (All patients who were eligible based on voiding diaries were randomized to 1 of 2 treatment)                                                                                                                                                                               | Low risk (Described "double-blinding")                    | Low risk (Described "double-blinding")          | Low risk (Drop out rate due to AE (DOX 1/76, Propiverine+ DOX 7/ 152), total drop out (DOX 9/76, Propiverine+DOX 21/152))                                | Low risk (The study protocol had been reported in the pre-specified way (primary and secondary))                                                                                                                                                                               | Low risk (IRB approved, appropriate declaration of Helsinki) |
| Kalpan, 2006   | Low risk (Described "randomized")                                         | Low risk (Randomized 1:1:1:1, The randomization scheme was prepared by the study biostatistician, applying a block size of 8, and produced) by the randomization administrator. Patients were dispensed study medication and randomized numbers were taken from the drug supply kit. | Low risk (Described "double-blinding")                    | Low risk (Described "double-blinding")          | Low risk (Described "ITT", drop out rate of each groups due to AE (TAM 7/215, Tol+TAM 20/225), total drop out rate (TAM 29/215, Tolteradine+TAM 34/225)) | High risk (Second efficacy measures Qmax is not described, Improvements in maximum urinary flow rate may be less likely in patients with greater urinary flow rates at baseline, reflecting unilateral regression to the mean artifact and part of the placebo effect complex) | Low risk (IRB approved)                                      |
| Maruyama, 2006 | Low risk (Described "randomized")                                         | Low risk (Patients were randomly divided into two groups based on medical chart numbers. Naftopidil monotherapy was administered to the 53 odd-numbered patients (monotherapy group))                                                                                                | Unclear                                                   | Unclear                                         | Low risk (Drop out rate of each groups due to AE (monotherapy 1/45, combine therapy 2/ 41) was similar)                                                  | Low risk (The study protocol had been reported in the pre-specified way (primary and secondary))                                                                                                                                                                               | Low risk (IRB approved)                                      |
| Yokoyama, 2009 | Unclear (Title described "randomized", body described "divided 3 groups") | Low risk (Subjects were registered through the study's website and divided according to daily urinary urgency episode)                                                                                                                                                               | High risk                                                 | High risk                                       | Low risk (Drop out rate due to AE 4/66, did not make a second visit 2/66, couldn't be obtained were excluded 2/66)                                       | Low risk (The study protocol had been reported in the pre-specified way (primary and secondary))                                                                                                                                                                               | Unclear                                                      |
| Wu, 2009       | Low risk (Described "randomized")                                         | Unclear                                                                                                                                                                                                                                                                              | Unclear                                                   | Unclear                                         | Unclear                                                                                                                                                  | High risk                                                                                                                                                                                                                                                                      | Unclear                                                      |
| Bae, 2011      | Low risk (Described "randomized")                                         | Low risk (Randomized 2:3, The patients were randomized by use of a randomization table)                                                                                                                                                                                              | Low risk (Single blind)                                   | High risk (Single blind)                        | Low risk (No drop out patients of each groups due to AE)                                                                                                 | Low risk (The study protocol had been reported in the pre-specified way (primary and secondary))                                                                                                                                                                               | Low risk (IRB approved)                                      |

(Continued)

Table 2. (Continued)

| Study               | Random sequence selection bias)   | Allocation concealment (selection bias)                                                                                                                                      | Blinding of participants and personnel (performance bias) | Blinding of outcome assessment (detection bias) | Incomplete outcome data (attrition bias)                                                                                                                                                                  | Selective reporting (reporting bias)                                                             | Other bias                                     |
|---------------------|-----------------------------------|------------------------------------------------------------------------------------------------------------------------------------------------------------------------------|-----------------------------------------------------------|-------------------------------------------------|-----------------------------------------------------------------------------------------------------------------------------------------------------------------------------------------------------------|--------------------------------------------------------------------------------------------------|------------------------------------------------|
| Gan, 2011           | Low risk (Described "randomized") | Unclear                                                                                                                                                                      | Unclear                                                   | Unclear                                         | Unclear                                                                                                                                                                                                   | Low risk (The study protocol had been reported in the pre-specified way (primary and secondary)) | Unclear                                        |
| Shen, 2011          | Low risk (Described "randomized") | Unclear                                                                                                                                                                      | Unclear                                                   | Unclear                                         | Unclear                                                                                                                                                                                                   | High risk                                                                                        | Unclear                                        |
| Seo, 2011           | Low risk (Described "randomized") | Low risk (Divided into two groups by using a table of random sampling numbers)                                                                                               | Unclear                                                   | Unclear                                         | Low risk (Drop out of each groups (TAM 1/30, TAM +Soli 3/30) was similar)                                                                                                                                 | Low risk (The study protocol had been reported in the pre-specified way (primary and secondary)) | Unclear                                        |
| Lee, 2011           | Low risk (Described "randomized") | Low risk (The randomization scheme was prepared by the study biostatistician, applying a blocked randomization to minimize systematic error and potential investigator bias) | Low risk (Described "double-blinding")                    | Low risk (Described "double-blinding")          | Low risk (Described "ITT", drop out rate of each groups due to AE (DOX + placebo 1/91, DOX+Tol 3/85), total drop out (DOX + placebo 28/91, DOX+Tol 21/85) was similar)                                    | Low risk (The study protocol had been reported in the pre-specified way (primary and secondary)) | Low risk (IRB approved)                        |
| Kerrebroeck, 2013_S | Low risk (Described "randomized") | Low risk (Randomized (1:1:1:1) using an interactive response technology to 12 wk of double blind treatment with placebo)                                                     | Low risk (Described "double-blinding")                    | Low risk (Described "double-blinding")          | Low risk (Drop out rate of each groups due to AE (placebo 3/341, TOCAS 5/326, soli6+TAM 9/337, soli9+TAM 8/324) was similar)                                                                              | Low risk (The study protocol had been reported in the pre-specified way (primary and secondary)) | Low risk (Appropriate declaration of Helsinki) |
| Kerrebroeck, 2013_N | Low risk (Described "randomized") | Low risk (2:4:4:4:1:1:1 randomization ratio, controlled absorption system)                                                                                                   | Low risk (Described "double-blinding")                    | Low risk (Described "double-blinding")          | Low risk (Drop out rate of each groups due to AE (placebo 0/92, Soli3 1/43, Soli6 1/43, Soli9 1/44, Tocas0.4 5/179, Tocas0.4+Soli3 5/180, Tocas0.4 +Soli6 3/180, Tocas0.4+Soli9 10/176) was similar rate) | Low risk (The study protocol had been reported in the pre-specified way (primary and secondary)) | Low risk (Appropriate declaration of Helsinki) |
| Wang, 2013          | Low risk (Described "randomized") | Unclear                                                                                                                                                                      | Unclear                                                   | Unclear                                         | Low risk (No drop out patients of each groups due to AE)                                                                                                                                                  | Low risk (The study protocol had been reported in the pre-specified way (primary and secondary)) | Unclear                                        |

(Continued)



Table 2. (Continued)

| Study           | Random sequence selection bias)   | Allocation concealment (selection bias)                                                                                                                                      | Blinding of participants and personnel (performance bias) | Blinding of outcome assessment (detection bias) | Incomplete outcome data (attrition bias)                                                                     | Selective reporting (reporting bias)                                                             | Other bias                                                   |
|-----------------|-----------------------------------|------------------------------------------------------------------------------------------------------------------------------------------------------------------------------|-----------------------------------------------------------|-------------------------------------------------|--------------------------------------------------------------------------------------------------------------|--------------------------------------------------------------------------------------------------|--------------------------------------------------------------|
| Lee, 2014       | Low risk (Described "randomized") | Low risk (The randomization scheme was prepared by the study biostatistician, applying a blocked randomization to minimize systematic error and potential investigator bias) | Low risk (Blind to patient)                               | Low risk (Blinded to investigators)             | Low risk (Described "ITT", drop out rate of each groups due to AE (TAM 1/80, TAM0.2+Soli5 0/76) was similar) | Low risk (The study protocol had been reported in the pre-specified way (primary and secondary)) | Low risk (IRB approved)                                      |
| Lee, 2016       | Low risk (Described "randomized") | Unclear                                                                                                                                                                      | Unclear                                                   | Unclear                                         | Low risk (Drop out rate of each groups due to AE (mono 6/44, soli5mg 5/55, soli 10mg 9/47) was similar)      | Low risk (The study protocol had been reported in the pre-specified way (primary and secondary)) | Low risk (IRB approved, appropriate declaration of Helsinki) |
| Matsukawa, 2016 | Low risk (Described "randomized") | Low risk (Using random number table)                                                                                                                                         | Unclear                                                   | Unclear                                         | Low risk (No drop out patients of each groups due to AE)                                                     | Low risk (The study protocol had been reported in the pre-specified way (primary and secondary)) | Low risk (Appropriate declaration of Helsinki)               |

Kerrebroeck, 2013\_S, SATURN trial; Kerrebroeck, 2013\_N, NEPTUNE trial; DOX, doxazosin; TAM, tamsulosin; IRB, Institutional Review Board

doi:10.1371/journal.pone.0169248.t002

double-blinded[13,19–21,24,25]. The qualities of the included studies along with detailed reasons for judgment of the qualities are described in Table 2.

### Outcome findings

Detailed findings of efficacy in the included RCTs are shown in Fig 2. Total IPSS (15 trials), storage IPSS (11 trials), QoL (11 trials), Qmax (12 trials), and PVR (11 trials) were analyzed.

Detailed data on total IPSS were reported in a total of 15 trials (n = 3,122; 1,978 experimental subjects and 1,144 controls). The pooled overall SMD change of IPSS improvement from baseline for the combination group (experimental group) versus the alpha blocker monotherapy group (control group) was -0.03 (95% CI: -0.14–0.08). There was significant (p = 0.002) heterogeneity and Higgins' I<sup>2</sup> was 53.3% (Fig 2a). Although total IPSS did not show the significant superior outcome in combination group, the direction was toward the superior outcome for combination group.

Detailed data on storage IPSS were reported in a total of 11 trials (n = 2353; 1180 experimental subjects and 1173 controls). The pooled overall SMD change of IPSS improvement from baseline for the combination group versus the alpha blocker monotherapy group was -0.28 (95% CI: -0.40–0.17). There was marginal significance (p = 0.077) in heterogeneity and Higgins' I<sup>2</sup> was 38.5% (Fig 2b). To evaluate subjective factors for storage symptoms, subgroup analysis was performed. Results showed that SMD changes in storage IPSS improvement from baseline were -0.37 (95% CI: -0.51 - -0.23) in the storage-symptom dominant group and -0.14 (95% CI: -0.25 - -0.02) in the storage-symptom non-dominant group, respectively (Fig 2b). Storage IPSS showed the significant superior outcome in combination group regardless of storage dominant subgroup.



Detailed data on QoL were reported in a total of 11 trials ( $n = 2,149$ ; 1,085 experimental subjects and 1,064 controls). The SMD change of QoL improvement from baseline for the combination group versus the alpha blocker monotherapy group was  $-0.29$  (95% CI:  $-0.50 - -0.07$ ). Heterogeneity test resulted in a value of  $p < 0.001$ . Higgins'  $I^2$  value was 80.2% (Fig 2c). Although the heterogeneity was high, QoL showed the significant superior outcome in combination group.

Detailed data on Qmax were reported in a total of 12 trials ( $n = 2,385$ ; 1,243 experimental subjects and 1,142 controls). The pooled overall SMD change of Qmax improvement from baseline for the combination group versus the alpha blocker monotherapy group was  $-0.00$  (95% CI:  $-0.08-0.08$ ). A heterogeneity test resulted in a value of  $p = 0.766$ . Higgins'  $I^2$  value was 0% (Fig 2d). Qmax showed no significant superior outcome in combination group.

Detailed data on PVR were reported in a total of 11 trials ( $n = 2,079$ ; 1,088 experimental subjects and 991 controls). The SMD change of PVR improvement from baseline for the combination group versus the alpha blocker monotherapy group was  $0.56$  (95% CI:  $0.23-0.89$ ). A heterogeneity test resulted in a value of  $p < 0.001$ . Higgins'  $I^2$  value was 91.7% (Fig 2e). To determine selected factors for storage dominant symptoms, subgroup analysis was performed. Results showed that SMD changes of PVR from baseline were  $0.78$  (95% CI:  $0.09-1.48$ ) in the storage-symptom dominant group and  $0.34$  (95% CI:  $0.18-0.49$ ) in the storage-symptom non-dominant group (Fig 2e). PVR showed significant increase in both group of storage dominant subgroup.

Sensitivity analysis was performed to reveal the overall SMD change of storage IPSS and PVR according to study quality in storage dominant groups. The combination of tamsulosin and solifenacin produced studies of equally high quality compared to other combinations. Hence, the quality of studies was replaced by drug combination type. Storage IPSS showed significant improvement in both subgroups, but SMD was greater in tamsulosin and solifenacin group (Fig 3a). PVR showed significant increase in combination groups. However, in both subgroups, PVR showed a non-significant increase in the group of tamsulosin and solifenacin, with a value of  $1.42$  (95% CI,  $-0.41-3.24$ ), and also in other types, with a value of  $0.40$  (95% CI,  $-0.07-0.86$ ) (Fig 3b).

Meta-regression analysis of IPSS storage and PVR showed that there was no significant moderator effect for the number of patients, study duration, country, or particular combination therapy (Table 3).

## Safety

Four of sixteen studies described adverse events beyond PVR and AUR. The incidence of adverse events was higher in the combination group compared to that in the monotherapy group (24.7% vs 19.3%,  $p = 0.001$ ). Voiding difficulty, AUR, and significant PVR showed no significant differences in incidence rates ( $p = 0.230$ ,  $p = 0.325$ , and  $p = 1.000$ , respectively) between the combination group and the monotherapy group. Among adverse events involving the autonomic nervous system, constipation, dry mouth, and dyspepsia showed significant differences ( $p < 0.001$ ,  $p < 0.001$ , and  $p = 0.001$ , respectively), with the combination group having higher incidence rates.

## Publication bias

In the analysis performed for total IPSS, Begg and Mazumdar's correlation was  $0.10$  ( $p = 0.922$ ). Egger's regression intercept was  $-0.002$  ( $p = 0.998$ ). Visual inspection of the graphic in funnel plot (Fig 4) suggested that there was no evidence of publication bias or small-study effect in this meta-analysis.

a. Sensitivity analysis for IPSS\_storage

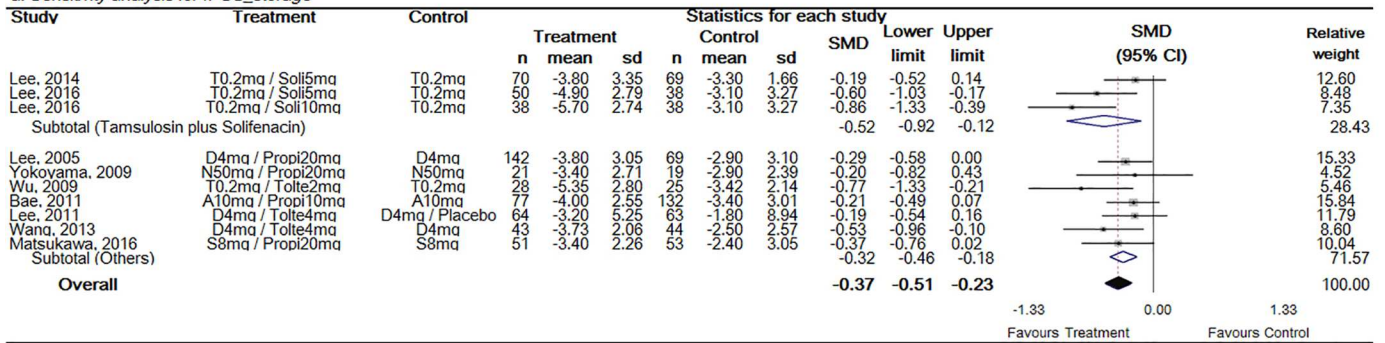

b. Sensitivity analysis for PVR

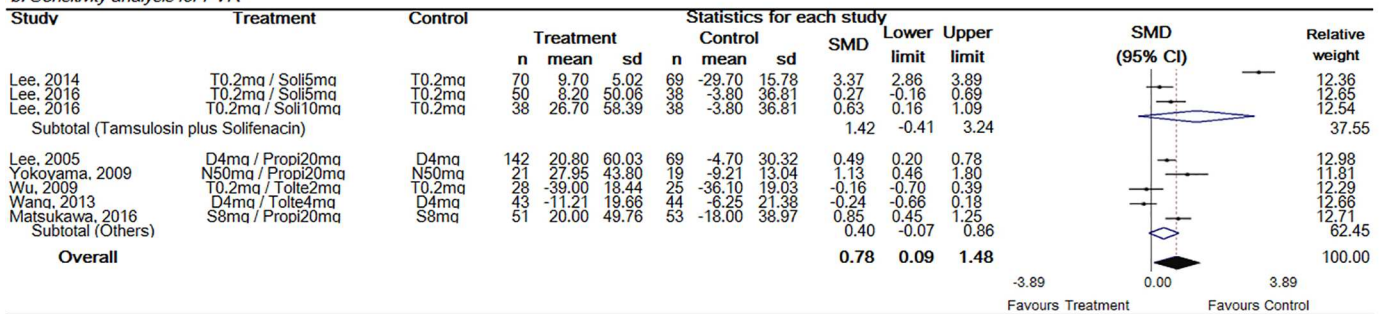

**Fig 3. Sensitivity analysis for storage IPSS and PVR in the storage symptom dominant groups.** Storage IPSS showed significant improvement in both group, but SMD was greater in tamsulosin and solifenacin group. The size of each square depends on the weight of each study. All data provided are for continuous outcomes.

doi:10.1371/journal.pone.0169248.g003

## Discussion

At the beginning of this study, our hypothesis was that storage symptoms were mainly bladder problems, not originating from prostate issues. Hence, initial combination treatment with alpha blockers and anticholinergics could be more effective without increasing the risk of adverse events in BPH/LUTS patients with OAB symptoms.

Although voiding symptoms are the most common micturition symptoms among BPH/LUTS patients and they can be well controlled by alpha blocker monotherapy, clinicians should take into account that storage symptoms might not be well-controlled by alpha blocker monotherapy [27]. More than 50% of BPH/LUTS patients have complaints of storage symptoms which are intolerable without using anticholinergics [12]. To overcome the limitative

**Table 3. Meta-regression of storage IPSS and PVR.**

| Variables                   | Storage IPSS |        |        |       |        |        | PVR   |        |        |       |        |        |       |       |
|-----------------------------|--------------|--------|--------|-------|--------|--------|-------|--------|--------|-------|--------|--------|-------|-------|
|                             | k            | Coef.* | SMD    | SE    | 95% CI | P†     | k     | Coef.* | SMD    | SE    | 95% CI | P†     |       |       |
| No. of patients             | 13           | 0.001  |        | 0.001 | -0.002 | 0.005  | 0.332 | 15     | 0.007  |       | 0.006  | -0.006 | 0.021 | 0.259 |
| Study duration (weeks)      | 13           | -0.005 |        | 0.041 | -0.099 | 0.089  | 0.904 | 15     | -0.059 |       | 0.120  | -0.329 | 0.212 | 0.634 |
| Country                     |              |        |        |       |        |        | 0.520 |        |        |       |        |        |       | 0.164 |
| Asian                       | 11           |        | -0.351 |       | -0.492 | -0.210 |       | 11     |        | 0.620 |        | 0.100  | 1.150 |       |
| Western                     | 2            |        | -0.143 |       | -0.256 | -0.030 |       | 3      |        | 0.371 |        | 0.240  | 0.500 |       |
| Combination agents          |              |        |        |       |        |        | 0.930 |        |        |       |        |        |       | 0.198 |
| Tamsulosin plus Solifenacin | 6            |        | -0.266 |       | -0.457 | -0.075 |       | 7      |        | 0.360 |        | 0.010  | 0.720 |       |
| Others                      | 7            |        | -0.317 |       | -0.457 | -0.176 |       | 7      |        | 0.560 |        | 0.230  | 0.890 |       |

doi:10.1371/journal.pone.0169248.t003



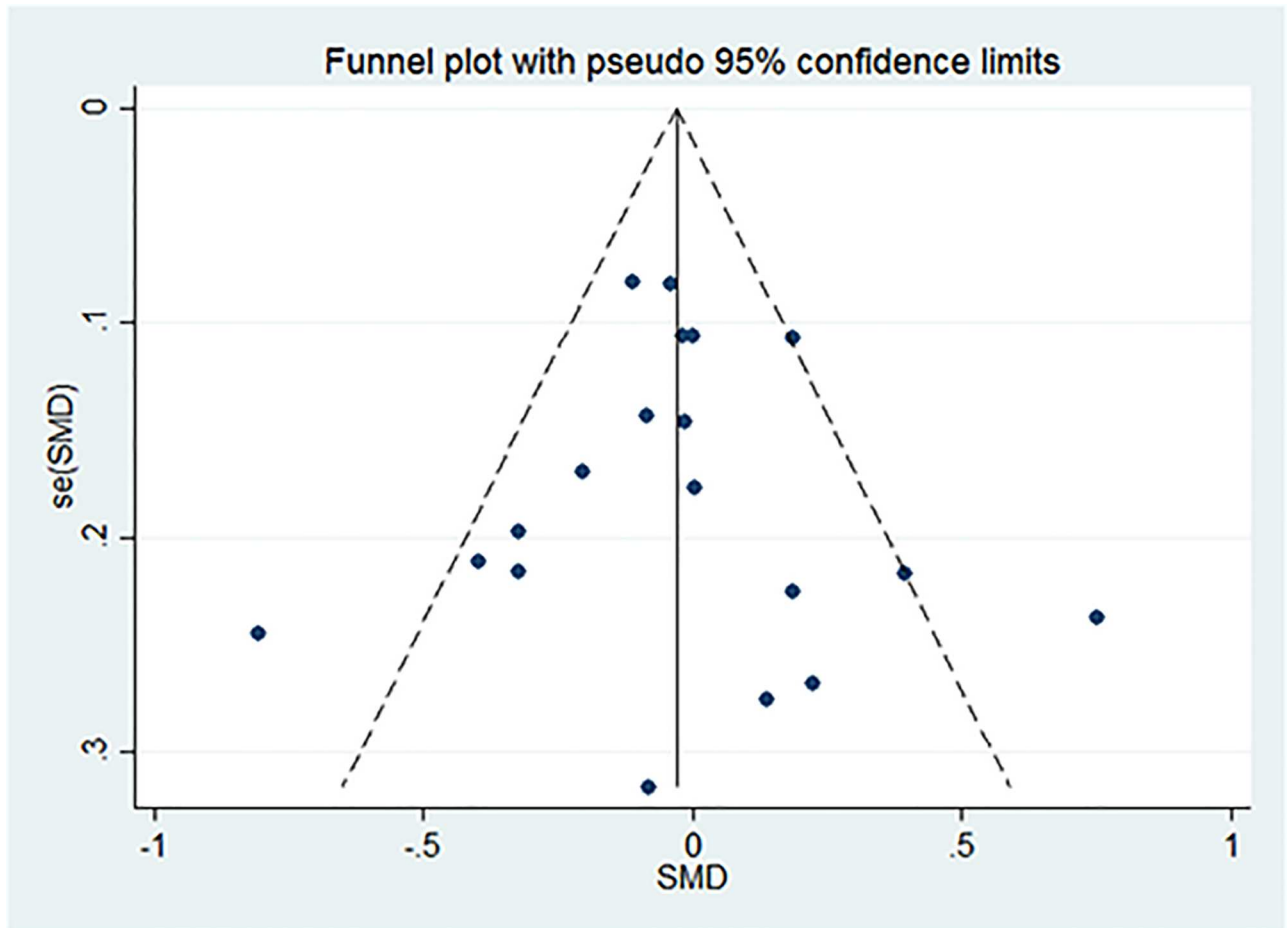

**Fig 4. Funnel plot with pseudo 95% confidence limits of total IPSS.**

doi:10.1371/journal.pone.0169248.g004

effect of alpha blocker monotherapy, many studies have attempted to use anticholinergics earlier in treatment with favorable efficacy and safety [3,10,12]. Clinical trials of “add on” therapies of anticholinergics to conventional alpha blocker maintenance or induction treatment with alpha blockers preceding clinical trials on the initial combination of the two medications might have possible adverse effects caused by anticholinergics. They might have inhibitory effect on contraction.

There are three main reasons that initial combination treatment is superior to “add on” or induction treatment. First, adverse events including voiding difficulties, especially AUR, are not as frequent as conventionally believed. Second, controlling storage symptoms themselves is the most important factor in improving quality of life. Third, conventional alpha blocker monotherapy has limited efficacy in improving storage symptoms, which can result in aggravation of voiding symptoms after 3 months of treatment with alpha blocker monotherapy.

Safety is the first and the most important reason for recommending the initial use of anticholinergics. A large-scale observational study has shown that anticholinergic medication is not frequently recommended in clinical practice for the treatment of BPH/LUTS. Less than 3% of patients are given anticholinergics [28]. This low rate of usage of anticholinergics is attributable to timidity amongst clinicians who believe that anticholinergic medications might aggravate voiding symptoms by decreasing Qmax and increasing PVR, thus leading to urinary

retention [29]. Liao et al. have reported that anticholinergic treatment is more effective in patients with small prostate and storage dominant symptoms than in those who have large prostate without storage dominant symptoms [30]. Recently, Lee et al [31] reported the efficacy of initial combined treatment of tamsulosin plus solifenacin for men with LUTS. However, they also emphasized initial dose modification of anticholinergics due to prevent adverse events.

However, many emerging studies have reported that anticholinergics do not have absolutely negative effect on detrusor contraction or increase AUR [3,32]. Two previous SRs with meta-analyses have shown the safety of combination treatment, especially regarding the aggravation of voiding symptoms and AUR. Similar results were obtained in the present study.<sup>5,6</sup> Although there was a significant increase in PVR and a decreasing trend in Qmax in the initial combination group, the incidence of AUR was exceedingly rare. This is the most consequential finding of our SR.

The long-term safety of combination treatment has been proven by Matsukawa et al. [16]. Although combination treatment did increase PVR by a mean of 20 cc, only 13.7% of patients in the combination group had increase of PVR of more than 50 cc. Moreover, more evidence are emerging, showing that anticholinergic treatment is not significantly associated with a safety issue even among patients with severe BOO (bladder outlet obstruction). Abrams et al. have reported that treatment with tolterodine 2 mg for 3 months in BOO patients (confirmed by urodynamic study) has produced no difference in the incidence of AUR compared to placebo treatment [33]. Kaplan et al. have reported that BOO patients with unfavorable outcomes of previous alpha blocker monotherapy have favorable outcomes including improvement of both Qmax and PVR when they are treated with tolterodine 4 mg for 6 months [34]. The main reason for these positive results is that anticholinergics do not interfere with the releasing of a large amount of acetylcholine during detrusor contraction [35].

Two recent SRs with meta-analyses and the results of the present study showed that other adverse events such as dry mouth, constipation, and so on in addition to voiding difficulty were not serious in the combination group.

The second important rationale for considering initial combination treatment is that it can relieve storage symptoms. When treating LUTS in males, relief of storage symptoms have historically played a key role in increasing patient satisfaction. Among storage symptoms, urgency, urge incontinence, and nocturia are the main factors in patient satisfaction. Treatment of these symptoms has resulted in an elevation of QoL [36,37]. The previous “add on” study design in which anticholinergics are given after the initial alpha blocker treatment has focused on the relief of bothersome storage symptoms. However, storage symptoms failed to be relieved by alpha blocker monotherapy [3].

OAB has significant impact on QoL in both men and women. OAB has negative impact on health-related QoL. It has been shown that increase levels of depression and sexual dysfunction can negatively affect work productivity in EPIC sub-analysis studies [36,37]. In our study, QoL showed a significant improvement in the combination treatment group compared to that in the alpha blocker monotherapy group. Our results showed that, although total IPSS had a positive trend, storage IPSS showed significant improvement in both groups. This clarifies that improvement of storage symptoms is the main factor that leads to improvement of QoL in our results.

Although alpha blocker monotherapy can significantly improve micturition symptoms within 3 months, it does not guarantee a persistent improvement in LUTS, especially in BPH/LUTS patients with OAB. This factor is quite important, although many “add on” trials of anticholinergics have demonstrated its efficacy. Besides those “add on” trials, long-term results of comparisons between combination treatment and alpha blocker monotherapy have revealed



that alpha blocker monotherapy is unable to offer long-term effect for BPH/LUTS patients with OAB [16,32]. Moreover, in the group receiving alpha blocker monotherapy, the improvement did not last longer than 3 months. In fact, it often aggravated the OAB after 3 months.<sup>16</sup> On the contrary, with combination treatment, OAB symptoms could be resolved within 4 weeks after starting the medications [16].

Two SRs with meta-analyses have described this issue. However, those studies need to be updated. More initial combination trials have been conducted recently after the two SRs. These studies need to be included in SRs. Moreover, the two previous SRs studies included earlier combination studies in which anticholinergics were ‘added on’ after alpha blocker induction. Therefore, they not true studies using the initial combination treatment strategy. Our SR with meta-analysis is updated. It included most recent trials. Moreover, we not only included double-blinded RCTs, but also included RCTs and non-RCTs to overcome the issue of a small number of studies. We also tried to describe not only subjective outcomes including IPSS, storage IPSS, voiding IPSS, and QoL, but also objective outcomes including Qmax and PVR.

However, this study has several limitations. First, this study did not include urodynamic finding (a gold standard for measuring voiding dysfunction) as an outcome measurement. However, most studies on alpha blockers or anticholinergics did not include the results of urodynamic studies. Their main focus was on subjective satisfactory outcomes such as IPSS. To date, only a few studies have used urodynamic measurements to monitor clinical improvement produced by anticholinergic treatment [33,38].

Second, this study did not include long-term outcomes. However, it is more important to analyze the effect of initial combination treatment in the first 3 months because gradual improvement of storage symptoms in BPH/LUTS patients with OAB has been found in the long-term results of an initial combination trial [16]. Moreover, to date, only a few studies have reported the outcomes after combination treatment at more than 3 months [32]. Third, several trials have incomplete data. They could not be used in the analysis. For example, the TIMES trial [13] is a very important and high-quality trial. However, it was not included in our analysis because there was no measurement for the main outcomes. Addition or deletion of outcome measurements in this study should not change the trend of the results of outcome analysis.

Fourth, statistical heterogeneity was noted in our analysis. This was partially rectified using random effects models [39]. Lastly, our study included heterogeneous drug combinations. To overcome this phenomenon, sensitivity analysis was performed. It illustrated favorable outcomes of tamsulosin and solifenacin combination treatment with low inner heterogeneity. This is attributable to the characteristics of clinical trials with the use of a combination of tamsulosin and solifenacin. Such trials were predominantly double-blinded RCTs. We could not validate the superiority of this combination including tamsulosin and solifenacin compared with other combination types in this study, unlike that in the UK NHS trials [40].

## Conclusions

Initial administration of alpha blockers combined with anticholinergic agents provides favorable clinical outcomes with fewer adverse events as shown by both subjective and objective outcome measurements. Such initial combination differs from earlier addition of anticholinergics in that patients can benefit from earlier treatment results. OAB symptoms must be treated directly with initial anticholinergic treatment to prevent the waste of treatment time associated with alpha blocker monotherapy.

## Supporting Information

**S1 Checklist. PRISMA Check List.**  
(DOC)

## Acknowledgments

This study was supported by Astellas Pharma Korea, Inc. and Soonchunhyang University Research Fund, Republic of Korea. The funders had no role in study design, data collection and analysis, decision to publish, or preparation of the manuscript.

## Author Contributions

**Conceptualization:** JHK.

**Data curation:** HYS HC SWD.

**Formal analysis:** HJK YMK.

**Funding acquisition:** JHK.

**Investigation:** JHK HJK.

**Methodology:** JHK HJK YMK.

**Project administration:** JHK.

**Resources:** HYS.

**Software:** JHK HYS.

**Supervision:** JYP WJY JHB YSS.

**Validation:** JHK HJK YMK.

**Visualization:** JHK HYS.

**Writing – original draft:** JHK.

**Writing – review & editing:** JHK.

## References

1. Homma Y, Gotoh M, Yokoyama O, Masumori N, Kawauchi A, et al. (2011) Outline of JUA clinical guidelines for benign prostatic hyperplasia. *Int J Urol* 18: 741–756. doi: [10.1111/j.1442-2042.2011.02860.x](https://doi.org/10.1111/j.1442-2042.2011.02860.x) PMID: [22050351](https://pubmed.ncbi.nlm.nih.gov/22050351/)
2. Oelke M, Bachmann A, Descazeaud A, Emberton M, Gravas S, et al. (2013) EAU guidelines on the treatment and follow-up of non-neurogenic male lower urinary tract symptoms including benign prostatic obstruction. *Eur Urol* 64: 118–140. doi: [10.1016/j.eururo.2013.03.004](https://doi.org/10.1016/j.eururo.2013.03.004) PMID: [23541338](https://pubmed.ncbi.nlm.nih.gov/23541338/)
3. Yamaguchi O, Kakizaki H, Homma Y, Takeda M, Nishizawa O, et al. (2011) Solifenacin as add-on therapy for overactive bladder symptoms in men treated for lower urinary tract symptoms—ASSIST, randomized controlled study. *Urology* 78: 126–133. doi: [10.1016/j.urology.2011.02.055](https://doi.org/10.1016/j.urology.2011.02.055) PMID: [21601248](https://pubmed.ncbi.nlm.nih.gov/21601248/)
4. Yamaguchi O, Nishizawa O, Takeda M, Yokoyama O, Homma Y, et al. (2009) Clinical guidelines for overactive bladder. *Int J Urol* 16: 126–142. doi: [10.1111/j.1442-2042.2008.02177.x](https://doi.org/10.1111/j.1442-2042.2008.02177.x) PMID: [19228224](https://pubmed.ncbi.nlm.nih.gov/19228224/)
5. Filson CP, Hollingsworth JM, Clemens JQ, Wei JT (2013) The efficacy and safety of combined therapy with alpha-blockers and anticholinergics for men with benign prostatic hyperplasia: a meta-analysis. *J Urol* 190: 2153–2160. doi: [10.1016/j.juro.2013.05.058](https://doi.org/10.1016/j.juro.2013.05.058) PMID: [23727412](https://pubmed.ncbi.nlm.nih.gov/23727412/)
6. Hao N, Tian Y, Liu W, Wazir R, Wang J, et al. (2014) Antimuscarinics and alpha-blockers or alpha-blockers monotherapy on lower urinary tract symptoms—a meta-analysis. *Urology* 83: 556–562. doi: [10.1016/j.urology.2013.10.034](https://doi.org/10.1016/j.urology.2013.10.034) PMID: [24361007](https://pubmed.ncbi.nlm.nih.gov/24361007/)

7. Matsukawa Y, Hattori R, Sassa N, Yamamoto T, Gotoh M (2013) What are the factors contributing to failure in improvement of subjective symptoms following silodosin administration in patients with benign prostatic hyperplasia? Investigation using a pressure-flow study. *Neurourol Urodyn* 32: 266–270. doi: [10.1002/nau.22286](https://doi.org/10.1002/nau.22286) PMID: [22907775](https://pubmed.ncbi.nlm.nih.gov/22907775/)
8. Engstrom G, Henningsohn L, Walker-Engstrom ML, Leppert J (2006) Impact on quality of life of different lower urinary tract symptoms in men measured by means of the SF 36 questionnaire. *Scand J Urol Nephrol* 40: 485–494. doi: [10.1080/00365590600830862](https://doi.org/10.1080/00365590600830862) PMID: [17130101](https://pubmed.ncbi.nlm.nih.gov/17130101/)
9. Peters TJ, Donovan JL, Kay HE, Abrams P, de la Rosette JJ, et al. (1997) The International Continence Society "Benign Prostatic Hyperplasia" Study: the bothersomeness of urinary symptoms. *J Urol* 157: 885–889. PMID: [9072592](https://pubmed.ncbi.nlm.nih.gov/9072592/)
10. Chapple C, Herschorn S, Abrams P, Sun F, Brodsky M, et al. (2009) Tolterodine treatment improves storage symptoms suggestive of overactive bladder in men treated with alpha-blockers. *Eur Urol* 56: 534–541. doi: [10.1016/j.eururo.2008.11.026](https://doi.org/10.1016/j.eururo.2008.11.026) PMID: [19070418](https://pubmed.ncbi.nlm.nih.gov/19070418/)
11. Chung SD, Chang HC, Chiu B, Liao CH, Kuo HC (2011) The efficacy of additive tolterodine extended release for 1-year in older men with storage symptoms and clinical benign prostatic hyperplasia. *Neurourol Urodyn* 30: 568–571. doi: [10.1002/nau.20923](https://doi.org/10.1002/nau.20923) PMID: [21344494](https://pubmed.ncbi.nlm.nih.gov/21344494/)
12. Kaplan SA, McCammon K, Fincher R, Fakhoury A, He W (2009) Safety and tolerability of solifenacin add-on therapy to alpha-blocker treated men with residual urgency and frequency. *J Urol* 182: 2825–2830. doi: [10.1016/j.juro.2009.08.023](https://doi.org/10.1016/j.juro.2009.08.023) PMID: [19837435](https://pubmed.ncbi.nlm.nih.gov/19837435/)
13. Kaplan SA, Roehrborn CG, Rovner ES, Carlsson M, Bavendam T, et al. (2006) Tolterodine and tamsulosin for treatment of men with lower urinary tract symptoms and overactive bladder: a randomized controlled trial. *JAMA* 296: 2319–2328. doi: [10.1001/jama.296.19.2319](https://doi.org/10.1001/jama.296.19.2319) PMID: [17105794](https://pubmed.ncbi.nlm.nih.gov/17105794/)
14. Liu S, Chan L, Tse V (2014) Clinical outcome in male patients with detrusor overactivity with impaired contractility. *Int Neurourol J* 18: 133–137. doi: [10.5213/inj.2014.18.3.133](https://doi.org/10.5213/inj.2014.18.3.133) PMID: [25279240](https://pubmed.ncbi.nlm.nih.gov/25279240/)
15. Takeda M, Nishizawa O, Gotoh M, Yoshida M, Takahashi S, et al. (2013) Clinical efficacy and safety of imidafenacin as add-on treatment for persistent overactive bladder symptoms despite alpha-blocker treatment in patients with BPH: the ADDITION study. *Urology* 82: 887–893. doi: [10.1016/j.urology.2013.05.008](https://doi.org/10.1016/j.urology.2013.05.008) PMID: [23953605](https://pubmed.ncbi.nlm.nih.gov/23953605/)
16. Matsukawa Y, Takai S, Funahashi Y, Kato M, Yamamoto T, et al. (2016) Long-term efficacy of a combination therapy with an anticholinergic agent and an alpha1-blocker for patients with benign prostatic enlargement complaining both voiding and overactive bladder symptoms: A randomized, prospective, comparative trial using a urodynamic study. *Neurourol Urodyn*.
17. Lee (2007) A Study on the Efficacy of Combination Therapy with Alpha-blockers and Anticholinergics in the Lower Urinary Tract Symptoms Patients Accompanied with Overactive Bladder Symptoms.
18. Bae JH, Kim SO, Yoo ES, Moon KH, Kyung YS, et al. (2011) Efficacy and safety of low-dose propiverine in patients with lower urinary tract symptoms/benign prostatic hyperplasia with storage symptoms: a prospective, randomized, single-blinded and multicenter clinical trial. *Korean J Urol* 52: 274–278. doi: [10.4111/kju.2011.52.4.274](https://doi.org/10.4111/kju.2011.52.4.274) PMID: [21556215](https://pubmed.ncbi.nlm.nih.gov/21556215/)
19. Lee KS, Choo MS, Kim DY, Kim JC, Kim HJ, et al. (2005) Combination treatment with propiverine hydrochloride plus doxazosin controlled release gastrointestinal therapeutic system formulation for overactive bladder and coexisting benign prostatic obstruction: a prospective, randomized, controlled multicenter study. *J Urol* 174: 1334–1338. PMID: [16145414](https://pubmed.ncbi.nlm.nih.gov/16145414/)
20. Lee SH, Byun SS, Lee SJ, Kim KH, Lee JY (2014) Effects of initial combined tamsulosin and solifenacin therapy for overactive bladder and bladder outlet obstruction secondary to benign prostatic hyperplasia: a prospective, randomized, multicenter study. *Int Urol Nephrol* 46: 523–529. doi: [10.1007/s11255-013-0551-7](https://doi.org/10.1007/s11255-013-0551-7) PMID: [24097273](https://pubmed.ncbi.nlm.nih.gov/24097273/)
21. Lee SH, Chung BH, Kim SJ, Kim JH, Kim JC, et al. (2011) Initial combined treatment with anticholinergics and alpha-blockers for men with lower urinary tract symptoms related to BPH and overactive bladder: a prospective, randomized, multi-center, double-blind, placebo-controlled study. *Prostate Cancer Prostatic Dis* 14: 320–325. doi: [10.1038/pcan.2011.22](https://doi.org/10.1038/pcan.2011.22) PMID: [21788967](https://pubmed.ncbi.nlm.nih.gov/21788967/)
22. Maruyama O, Kawachi Y, Hanazawa K, Koizumi K, Yamashita R, et al. (2006) Naftopidil monotherapy vs naftopidil and an anticholinergic agent combined therapy for storage symptoms associated with benign prostatic hyperplasia: A prospective randomized controlled study. *Int J Urol* 13: 1280–1285. doi: [10.1111/j.1442-2042.2006.01538.x](https://doi.org/10.1111/j.1442-2042.2006.01538.x) PMID: [17010005](https://pubmed.ncbi.nlm.nih.gov/17010005/)
23. Seo DH, Kam SC, Hyun JS (2011) Impact of lower urinary tract symptoms/benign prostatic hyperplasia treatment with tamsulosin and solifenacin combination therapy on erectile function. *Korean J Urol* 52: 49–54. doi: [10.4111/kju.2011.52.1.49](https://doi.org/10.4111/kju.2011.52.1.49) PMID: [21344031](https://pubmed.ncbi.nlm.nih.gov/21344031/)
24. van Kerrebroeck P, Chapple C, Drogendijk T, Klaver M, Sokol R, et al. (2013) Combination therapy with solifenacin and tamsulosin oral controlled absorption system in a single tablet for lower urinary tract

- symptoms in men: efficacy and safety results from the randomised controlled NEPTUNE trial. *Eur Urol* 64: 1003–1012. doi: [10.1016/j.eururo.2013.07.034](https://doi.org/10.1016/j.eururo.2013.07.034) PMID: [23932438](https://pubmed.ncbi.nlm.nih.gov/23932438/)
25. Van Kerrebroeck P, Haab F, Angulo JC, Vik V, Katona F, et al. (2013) Efficacy and safety of solifenacin plus tamsulosin OCAS in men with voiding and storage lower urinary tract symptoms: results from a phase 2, dose-finding study (SATURN). *Eur Urol* 64: 398–407. doi: [10.1016/j.eururo.2013.03.031](https://doi.org/10.1016/j.eururo.2013.03.031) PMID: [23537687](https://pubmed.ncbi.nlm.nih.gov/23537687/)
  26. Yokoyama T, Uematsu K, Watanabe T, Sasaki K, Kumon H, et al. (2009) Naftopidil and propiverine hydrochloride for treatment of male lower urinary tract symptoms suggestive of benign prostatic hyperplasia and concomitant overactive bladder: a prospective randomized controlled study. *Scand J Urol Nephrol* 43: 307–314. doi: [10.1080/00365590902836740](https://doi.org/10.1080/00365590902836740) PMID: [19396723](https://pubmed.ncbi.nlm.nih.gov/19396723/)
  27. Dmochowski R (2006) Antimuscarinic therapy in men with lower urinary tract symptoms: what is the evidence? *Curr Urol Rep* 7: 462–467. PMID: [17052442](https://pubmed.ncbi.nlm.nih.gov/17052442/)
  28. Wei JT, Calhoun E, Jacobsen SJ (2005) Urologic diseases in America project: benign prostatic hyperplasia. *J Urol* 173: 1256–1261. doi: [10.1097/01.ju.0000155709.37840.fe](https://doi.org/10.1097/01.ju.0000155709.37840.fe) PMID: [15758764](https://pubmed.ncbi.nlm.nih.gov/15758764/)
  29. Tehranchi A, Rezaei Y, Shojaee R (2014) Tolterodine to relieve urinary symptoms following transurethral resection of the prostate: a double-blind placebo-controlled randomized clinical trial. *Korean J Urol* 55: 260–264. doi: [10.4111/kju.2014.55.4.260](https://doi.org/10.4111/kju.2014.55.4.260) PMID: [24741415](https://pubmed.ncbi.nlm.nih.gov/24741415/)
  30. Liao CH, Kuo HC (2015) How to choose first-line treatment for men with predominant storage lower urinary tract symptoms: a prospective randomised comparative study. *Int J Clin Pract* 69: 124–130. doi: [10.1111/ijcp.12488](https://doi.org/10.1111/ijcp.12488) PMID: [25495719](https://pubmed.ncbi.nlm.nih.gov/25495719/)
  31. Lee KW, Hur KJ, Kim SH, Cho SY, Bae SR, et al. (2016) Initial Use of High-Dose Anticholinergics Combined with Alpha-Blockers for Male Lower Urinary Tract Symptoms with Overactive Bladder: A Prospective, Randomized Preliminary Study. *Low Urin Tract Symptoms*.
  32. Drake MJ, Chapple C, Sokol R, Oelke M, Traudtner K, et al. (2015) Long-term safety and efficacy of single-tablet combinations of solifenacin and tamsulosin oral controlled absorption system in men with storage and voiding lower urinary tract symptoms: results from the NEPTUNE Study and NEPTUNE II open-label extension. *Eur Urol* 67: 262–270. doi: [10.1016/j.eururo.2014.07.013](https://doi.org/10.1016/j.eururo.2014.07.013) PMID: [25070148](https://pubmed.ncbi.nlm.nih.gov/25070148/)
  33. Abrams P, Kaplan S, De Koning Gans HJ, Millard R (2006) Safety and tolerability of tolterodine for the treatment of overactive bladder in men with bladder outlet obstruction. *J Urol* 175: 999–1004; discussion 1004. doi: [10.1016/S0022-5347\(05\)00483-0](https://doi.org/10.1016/S0022-5347(05)00483-0) PMID: [16469601](https://pubmed.ncbi.nlm.nih.gov/16469601/)
  34. Kaplan SA, Walmsley K, Te AE (2005) Tolterodine extended release attenuates lower urinary tract symptoms in men with benign prostatic hyperplasia. *J Urol* 174: 2273–2275 discussion 2275–2276. doi: [10.1097/01.ju.0000181823.33224.a0](https://doi.org/10.1097/01.ju.0000181823.33224.a0) PMID: [16280803](https://pubmed.ncbi.nlm.nih.gov/16280803/)
  35. Andersson KE (2010) Detrusor myocyte activity and afferent signaling. *Neurourol Urodyn* 29: 97–106. doi: [10.1002/nau.20784](https://doi.org/10.1002/nau.20784) PMID: [20025035](https://pubmed.ncbi.nlm.nih.gov/20025035/)
  36. Sexton CC, Coyne KS, Vats V, Kopp ZS, Irwin DE, et al. (2009) Impact of overactive bladder on work productivity in the United States: results from EpiLUTS. *Am J Manag Care* 15: S98–S107. PMID: [19355804](https://pubmed.ncbi.nlm.nih.gov/19355804/)
  37. Stewart WF, Van Rooyen JB, Cundiff GW, Abrams P, Herzog AR, et al. (2003) Prevalence and burden of overactive bladder in the United States. *World J Urol* 20: 327–336. PMID: [12811491](https://pubmed.ncbi.nlm.nih.gov/12811491/)
  38. Kaplan SA, He W, Koltun WD, Cummings J, Schneider T, et al. (2013) Solifenacin plus tamsulosin combination treatment in men with lower urinary tract symptoms and bladder outlet obstruction: a randomized controlled trial. *Eur Urol* 63: 158–165. doi: [10.1016/j.eururo.2012.07.003](https://doi.org/10.1016/j.eururo.2012.07.003) PMID: [22831853](https://pubmed.ncbi.nlm.nih.gov/22831853/)
  39. DerSimonian R, Laird N (1986) Meta-analysis in clinical trials. *Control Clin Trials* 7: 177–188. PMID: [3802833](https://pubmed.ncbi.nlm.nih.gov/3802833/)
  40. Nazir J, Heemstra L, van Engen A, Hakimi Z, Ivanescu C (2015) Cost-effectiveness of a fixed-dose combination of solifenacin and oral controlled adsorption system formulation of tamsulosin in men with lower urinary tract symptoms associated with benign prostatic hyperplasia. *BMC Urol* 15: 41. doi: [10.1186/s12894-015-0031-8](https://doi.org/10.1186/s12894-015-0031-8) PMID: [25956727](https://pubmed.ncbi.nlm.nih.gov/25956727/)
